# Supplementary material
Source: PubMed Central journal article supplement (PMC3959724)
Supplement: NIHMS555407-supplement-Evans_Ack_Permission.pdf [file NIHMS555407-supplement-Evans_Ack_Permission.pdf]

## Jonathan Schultz

---

**From:** Evans, Frank (NIH/NHLBI) [E] <evansf@nhlbi.nih.gov>  
**Sent:** Monday, December 09, 2013 7:57 AM  
**To:** Lauer, Michael (NIH/NHLBI) [E]  
**Cc:** Wu, Colin (NIH/NHLBI) [E]; Danthi, Narasimhan (NIH/NHLBI) [E]  
**Subject:** RE: PLEASE READ AND REPLY REQUESTED BY COB Friday December 13 -- Proposed revision for Circulation Research Paper

Mike,

Yes, that would be very generous of you.

Thanks,  
Frank

---

**From:** Lauer, Michael (NIH/NHLBI) [E]  
**Sent:** Sunday, December 08, 2013 9:55 PM  
**To:** Wu, Colin (NIH/NHLBI) [E]; Danthi, Narasimhan (NIH/NHLBI) [E]  
**Cc:** Evans, Frank (NIH/NHLBI) [E]  
**Subject:** PLEASE READ AND REPLY REQUESTED BY COB Friday December 13 -- Proposed revision for Circulation Research Paper  
**Importance:** High

Hi Colin and Simhan

Apologies for the delay.

Attached please find:

- 1) The Circ Research decision letter (which arrived just as the shut-down started).
- 2) Draft revised paper with mark-up (please don't make any edits directly on it, but instead let me know your thoughts through email).
- 3) Revised tables and figure legends.
- 4) Revised figures.
- 5) Draft revision letter.
- 6) R code (3 files) – see in particular “Percentiles\_analyses\_12\_8\_3.R”.
- 7) Analysis data sets (2 files).

Many thanks for your feedback and happy to discuss further.

Colin – could you also please loop in Peibei.

Frank – OK if we acknowledge you? You indicated in a prior discussion that would be OK, but want to check back in.

Much appreciated.

Mike
